# Supplementary material for: High Loading of Polygenic Risk for ADHD in Children With Comorbid Aggression
Source: Atypon-hosted journal article supplement (doi:10.1176/appi.ajp.2013.12081129), 2013-07-04
Supplement: 909_ds001.pdf [file 909_ds001.pdf]

### DSM-IV Aggressive and Covert Conduct Disorder Symptoms

| Aggressive Symptoms                                                                 | Covert Symptoms                                                                                                                    |
|-------------------------------------------------------------------------------------|------------------------------------------------------------------------------------------------------------------------------------|
| Often bullies, threatens, or intimidates others                                     | Has deliberately engaged in fire setting with the intention of causing serious damage                                              |
| Often initiates physical fights (not including fights with siblings)                | Has deliberately destroyed others' property (other than by fire setting)                                                           |
| Has used weapon that can cause serious physical harm to others                      | Has broken into someone else's house, building, or car                                                                             |
| Has been physically cruel to people                                                 | Often lies to obtain goods or favors or to avoid obligations (i.e., "cons" others)                                                 |
| Has been physically cruel to animals                                                | Has stolen items of nontrivial value without confronting the victim (e.g., shoplifting but without breaking and entering, forgery) |
| Has stolen while confronting the victim (e.g., mugging, purse snatching, extortion) |                                                                                                                                    |

NB: Aggressive symptom "has forced someone into sexual activity" was not asked in this sample.

Reference: Frick PJ, Lahey BB, Loeber R, Tannenbaum L, Van Horn Y, Christ MAG, Hart EA, Hanson K: Oppositional defiant disorder and conduct disorder: a meta-analytic review of factor analyses and cross-validation in a clinic sample. Clin Psychol Rev 1993; 13:319–340
